# Supplementary material
Source: publisher figshare collection journal article supplement (https://acs.figshare.com/ndownloader/files/3928819)
Supplement: Supplementary file 1 [file 3928819]

data_su1302

_publ_section_title          SU1302


_publ_contact_author_name     'Veronika Ehmke'


_publ_contact_author_address

'Department of Chemistry, Stanford University'


_publ_contact_author_email    vehmke@stanford.edu


_publ_contact_author_phone    '1 650 723 1100'


_publ_section_acknowledgements

;

We would like to thank the Office of the Vice President

of Research at the University of Notre Dame for financial

support for the purchase of the copper micro-focus source

used in this research.

;


_audit_creation_method            SHELXL-2012

_chemical_name_systematic

;

 ?

;

_chemical_name_common             ?

_chemical_melting_point           ?

_chemical_formula_moiety          

 '2(C28 H37 N O5 Si)'

_chemical_formula_sum

 'C56 H74 N2 O10 Si2'

_chemical_formula_weight          991.35


loop_

 _atom_type_symbol

 _atom_type_description

 _atom_type_scat_dispersion_real

 _atom_type_scat_dispersion_imag

 _atom_type_scat_source

 'C'  'C'   0.0181   0.0091

 'International Tables Vol C Tables 4.2.6.8 and 6.1.1.4'

 'H'  'H'   0.0000   0.0000

 'International Tables Vol C Tables 4.2.6.8 and 6.1.1.4'

 'N'  'N'   0.0311   0.0180

 'International Tables Vol C Tables 4.2.6.8 and 6.1.1.4'

 'O'  'O'   0.0492   0.0322

 'International Tables Vol C Tables 4.2.6.8 and 6.1.1.4'

 'Si'  'Si'   0.2541   0.3302

 'International Tables Vol C Tables 4.2.6.8 and 6.1.1.4'


_space_group_crystal_system       orthorhombic

_space_group_IT_number            18

_space_group_name_H-M_alt         'P 21 21 2'

_space_group_name_Hall            'P 2 2ab'


_shelx_space_group_comment

;

The symmetry employed for this shelxl refinement is uniquely defined

by the following loop, which should always be used as a source of

symmetry information in preference to the above space-group names.

They are only intended as comments.

;


loop_

 _space_group_symop_operation_xyz

 'x, y, z'

 '-x, -y, z'

 '-x+1/2, y+1/2, -z'

 'x+1/2, -y+1/2, -z'


_cell_length_a                    15.3680(3)

_cell_length_b                    55.5740(13)

_cell_length_c                    6.2795(2)

_cell_angle_alpha                 90

_cell_angle_beta                  90

_cell_angle_gamma                 90

_cell_volume                      5363.1(2)

_cell_formula_units_Z             4

_cell_measurement_temperature     120(2)

_cell_measurement_reflns_used     9995

_cell_measurement_theta_min       3.18

_cell_measurement_theta_max       70.35


_exptl_crystal_description        block

_exptl_crystal_colour             colorless

_exptl_crystal_density_meas       ?

_exptl_crystal_density_method     ?

_exptl_crystal_density_diffrn     1.228

_exptl_crystal_F_000              2128

_exptl_transmission_factor_min    ?

_exptl_transmission_factor_max    ?

_exptl_crystal_size_max           0.141

_exptl_crystal_size_mid           0.140

_exptl_crystal_size_min           0.102

_exptl_absorpt_coefficient_mu     1.075

_shelx_estimated_absorpt_T_min    0.863

_shelx_estimated_absorpt_T_max    0.898

_exptl_absorpt_correction_type    numerical

_exptl_absorpt_correction_T_min   0.8470

_exptl_absorpt_correction_T_max   0.9365

_exptl_absorpt_process_details    'SADABS (Sheldrick, 2008)'


_exptl_special_details

;

 ?

;


_diffrn_ambient_temperature       120(2)

_diffrn_radiation_wavelength      1.54184

_diffrn_radiation_type            CuK\a

_diffrn_source                    'Incoatec micro-focus'

_diffrn_source_monochromator      'MONTEL Multi-layer'

_diffrn_measurement_device_type   'Bruker APEX-II'

_diffrn_measurement_method

'combination of \w and \f-scans '

_diffrn_detector_area_resol_mean   8.33

_diffrn_reflns_number             75015

_diffrn_reflns_av_unetI/netI      0.0498

_diffrn_reflns_av_R_equivalents   0.0946

_diffrn_reflns_limit_h_min        -17

_diffrn_reflns_limit_h_max        18

_diffrn_reflns_limit_k_min        -68

_diffrn_reflns_limit_k_max        68

_diffrn_reflns_limit_l_min        -7

_diffrn_reflns_limit_l_max        7

_diffrn_reflns_theta_min          2.983

_diffrn_reflns_theta_max          71.523

_diffrn_reflns_theta_full         67.679

_diffrn_measured_fraction_theta_max   0.997

_diffrn_measured_fraction_theta_full  0.999

_diffrn_reflns_Laue_measured_fraction_max    0.997

_diffrn_reflns_Laue_measured_fraction_full   0.999

_diffrn_reflns_point_group_measured_fraction_max   0.995

_diffrn_reflns_point_group_measured_fraction_full  1.000

_reflns_number_total              10408

_reflns_number_gt                 8635

_reflns_threshold_expression      'I > 2\s(I)'

_reflns_Friedel_coverage          0.746

_reflns_Friedel_fraction_max      0.992

_reflns_Friedel_fraction_full     1.000


_reflns_special_details

;

 Reflections were merged by SHELXL according to the crystal

 class for the calculation of statistics and refinement.


 _reflns_Friedel_fraction is defined as the number of unique

 Friedel pairs measured divided by the number that would be

 possible theoretically, ignoring centric projections and

 systematic absences.

;


_computing_data_collection        'Bruker APEX-II v2013-2.0'

_computing_cell_refinement        'Bruker SAINT v8.27B'

_computing_data_reduction         'Bruker SAINT v8.27B'

_computing_structure_solution     'SHELXT-2012/2 (Sheldrick, 2012)'

_computing_structure_refinement   'SHELXL-2012 (Sheldrick, 2012)'

_computing_molecular_graphics     ?

_computing_publication_material   ?


_refine_special_details

;

 ?

;

_refine_ls_structure_factor_coef  Fsqd

_refine_ls_matrix_type            full

_refine_ls_weighting_scheme       calc

_refine_ls_weighting_details

;

 w=1/[\s^2^(Fo^2^)+(0.0817P)^2^+5.3800P]

 where P=(Fo^2^+2Fc^2^)/3

;

_atom_sites_solution_primary      vecmap

_atom_sites_solution_secondary    difmap

_atom_sites_solution_hydrogens    geom

_refine_ls_hydrogen_treatment     constr

_refine_ls_extinction_method      none

_refine_ls_extinction_coef        .

_refine_ls_abs_structure_details

;

 Flack x determined using 3170 quotients [(I+)-(I-)]/[(I+)+(I-)]

 (Parsons and Flack (2004), Acta Cryst. A60, s61).

;

_refine_ls_abs_structure_Flack    0.017(14)

_chemical_absolute_configuration  rmad

_refine_ls_number_reflns          10408

_refine_ls_number_parameters      636

_refine_ls_number_restraints      20

_refine_ls_R_factor_all           0.0829

_refine_ls_R_factor_gt            0.0669

_refine_ls_wR_factor_ref          0.1765

_refine_ls_wR_factor_gt           0.1644

_refine_ls_goodness_of_fit_ref    1.025

_refine_ls_restrained_S_all       1.041

_refine_ls_shift/su_max           0.000

_refine_ls_shift/su_mean          0.000


loop_

 _atom_site_label

 _atom_site_type_symbol

 _atom_site_fract_x

 _atom_site_fract_y

 _atom_site_fract_z

 _atom_site_U_iso_or_equiv

 _atom_site_adp_type

 _atom_site_occupancy

 _atom_site_site_symmetry_order

 _atom_site_calc_flag

 _atom_site_refinement_flags_posn

 _atom_site_refinement_flags_adp

 _atom_site_refinement_flags_occupancy

 _atom_site_disorder_assembly

 _atom_site_disorder_group

Si1 Si 0.66840(9) 0.16837(2) 0.3710(3) 0.0361(3) Uani 1 1 d . . . . .

O1 O 0.3615(2) 0.20996(6) 0.6323(6) 0.0377(8) Uani 1 1 d . . . . .

O2 O 0.3416(3) 0.24956(6) 0.6028(6) 0.0546(11) Uani 1 1 d . . . . .

O3 O 0.3591(3) 0.17020(6) 0.5832(6) 0.0445(9) Uani 1 1 d . . . . .

O4 O 0.5773(2) 0.18112(6) 0.2909(7) 0.0446(9) Uani 1 1 d . . . . .

O5 O 0.6631(2) 0.29816(6) 0.4079(6) 0.0407(9) Uani 1 1 d . . . . .

C1 C 0.3380(3) 0.23045(9) 0.5185(8) 0.0359(11) Uani 1 1 d . . . . .

C2 C 0.3103(3) 0.22370(8) 0.2963(8) 0.0294(10) Uani 1 1 d . . . . .

H2 H 0.2462 0.2262 0.2820 0.035 Uiso 1 1 calc R U . . .

C3 C 0.3300(3) 0.19677(8) 0.2814(8) 0.0317(10) Uani 1 1 d . . . . .

H3 H 0.2774 0.1879 0.2299 0.038 Uiso 1 1 calc R U . . .

C4 C 0.3500(3) 0.18976(9) 0.5066(9) 0.0351(11) Uani 1 1 d . . . . .

C5 C 0.4090(3) 0.19127(8) 0.1352(9) 0.0332(10) Uani 1 1 d . . . . .

H5A H 0.4340 0.1755 0.1743 0.040 Uiso 1 1 calc R U . . .

H5B H 0.3892 0.1903 -0.0146 0.040 Uiso 1 1 calc R U . . .

C6 C 0.4786(3) 0.21044(9) 0.1546(8) 0.0319(10) Uani 1 1 d . . . . .

C7 C 0.4555(3) 0.23361(8) 0.1483(8) 0.0279(9) Uani 1 1 d . . . . .

C8 C 0.3579(3) 0.23859(8) 0.1231(8) 0.0282(9) Uani 1 1 d . . . . .

H8 H 0.3400 0.2319 -0.0180 0.034 Uiso 1 1 calc R U . . .

C9 C 0.3294(3) 0.26511(8) 0.1271(9) 0.0320(10) Uani 1 1 d . . . . .

H9A H 0.2773 0.2670 0.0360 0.038 Uiso 1 1 calc R U . . .

H9B H 0.3127 0.2695 0.2744 0.038 Uiso 1 1 calc R U . . .

C10 C 0.3998(3) 0.28237(8) 0.0504(9) 0.0316(10) Uani 1 1 d . . . . .

H10A H 0.3786 0.2992 0.0593 0.038 Uiso 1 1 calc R U . . .

H10B H 0.4147 0.2789 -0.0999 0.038 Uiso 1 1 calc R U . . .

C11 C 0.4801(3) 0.27922(8) 0.1907(8) 0.0298(10) Uani 1 1 d . . . . .

H11 H 0.4643 0.2814 0.3440 0.036 Uiso 1 1 calc R U . . .

C12 C 0.5201(3) 0.25395(8) 0.1544(8) 0.0291(10) Uani 1 1 d . . . . .

H12 H 0.5617 0.2507 0.2734 0.035 Uiso 1 1 calc R U . . .

C13 C 0.5732(3) 0.25825(8) -0.0470(8) 0.0318(10) Uani 1 1 d . . . . .

C14 C 0.6182(3) 0.28214(8) -0.0124(8) 0.0339(11) Uani 1 1 d . . . . .

H14A H 0.6285 0.2904 -0.1500 0.041 Uiso 1 1 calc R U . . .

H14B H 0.6747 0.2798 0.0603 0.041 Uiso 1 1 calc R U . . .

C15 C 0.5555(3) 0.29690(8) 0.1280(8) 0.0306(10) Uani 1 1 d . . . . .

H15 H 0.5312 0.3106 0.0436 0.037 Uiso 1 1 calc R U . . .

C16 C 0.5979(3) 0.30637(8) 0.3273(9) 0.0333(11) Uani 1 1 d . . . . .

N1 N 0.5538(3) 0.32527(7) 0.4314(7) 0.0343(9) Uani 1 1 d . . . . .

C17 C 0.4773(3) 0.33696(9) 0.3683(10) 0.0401(12) Uani 1 1 d . . . . .

H17 H 0.4461 0.3342 0.2400 0.048 Uiso 1 1 calc R U . . .

C18 C 0.4559(4) 0.35283(10) 0.5223(10) 0.0471(14) Uani 1 1 d . . . . .

H18 H 0.4070 0.3633 0.5219 0.057 Uiso 1 1 calc R U . . .

C19 C 0.5198(4) 0.35103(10) 0.6854(10) 0.0480(14) Uani 1 1 d . . . . .

H19 H 0.5211 0.3601 0.8135 0.058 Uiso 1 1 calc R U . . .

C20 C 0.5779(4) 0.33425(9) 0.6270(9) 0.0413(12) Uani 1 1 d . . . . .

H20 H 0.6274 0.3294 0.7070 0.050 Uiso 1 1 calc R U . . .

C21 C 0.5714(3) 0.20185(9) 0.1625(9) 0.0378(12) Uani 1 1 d . . . . .

H21A H 0.5918 0.1981 0.0167 0.045 Uiso 1 1 calc R U . . .

H21B H 0.6090 0.2147 0.2215 0.045 Uiso 1 1 calc R U . . .

C22 C 0.7260(4) 0.18851(11) 0.5554(11) 0.0525(15) Uani 1 1 d . . . . .

H22A H 0.7483 0.2024 0.4770 0.079 Uiso 1 1 calc R U . . .

H22B H 0.7746 0.1798 0.6213 0.079 Uiso 1 1 calc R U . . .

H22C H 0.6857 0.1940 0.6664 0.079 Uiso 1 1 calc R U . . .

C23 C 0.7431(4) 0.16292(12) 0.1409(11) 0.0538(15) Uani 1 1 d . . . . .

H23A H 0.7199 0.1499 0.0525 0.081 Uiso 1 1 calc R U . . .

H23B H 0.8008 0.1584 0.1941 0.081 Uiso 1 1 calc R U . . .

H23C H 0.7478 0.1776 0.0555 0.081 Uiso 1 1 calc R U . . .

C24 C 0.6319(3) 0.13944(10) 0.4898(10) 0.0532(17) Uani 1 1 d D . . . .

C25 C 0.7105(4) 0.12474(10) 0.5675(13) 0.0605(19) Uani 1 1 d D . . . .

H25A H 0.7478 0.1207 0.4460 0.091 Uiso 1 1 calc R U . . .

H25B H 0.6901 0.1099 0.6352 0.091 Uiso 1 1 calc R U . . .

H25C H 0.7438 0.1342 0.6708 0.091 Uiso 1 1 calc R U . . .

C26A C 0.5633(9) 0.1259(2) 0.366(2) 0.056(3) Uiso 0.5 1 d D . P A 1

H26A H 0.5885 0.1200 0.2325 0.085 Uiso 0.5 1 calc R U P A 1

H26B H 0.5147 0.1368 0.3335 0.085 Uiso 0.5 1 calc R U P A 1

H26C H 0.5422 0.1124 0.4506 0.085 Uiso 0.5 1 calc R U P A 1

C27A C 0.5761(9) 0.1474(3) 0.6902(19) 0.048(3) Uiso 0.5 1 d D . P A 1

H27A H 0.5246 0.1562 0.6423 0.073 Uiso 0.5 1 calc R U P A 1

H27B H 0.6114 0.1577 0.7824 0.073 Uiso 0.5 1 calc R U P A 1

H27C H 0.5579 0.1330 0.7697 0.073 Uiso 0.5 1 calc R U P A 1

C26B C 0.5928(8) 0.1239(2) 0.3026(18) 0.043(3) Uiso 0.5 1 d D . P A 2

H26D H 0.5843 0.1073 0.3515 0.064 Uiso 0.5 1 calc R U P A 2

H26E H 0.6331 0.1240 0.1817 0.064 Uiso 0.5 1 calc R U P A 2

H26F H 0.5368 0.1307 0.2586 0.064 Uiso 0.5 1 calc R U P A 2

C27B C 0.5651(12) 0.1396(4) 0.666(3) 0.080(6) Uiso 0.5 1 d D . P A 2

H27D H 0.5729 0.1253 0.7555 0.120 Uiso 0.5 1 calc R U P A 2

H27E H 0.5066 0.1394 0.6038 0.120 Uiso 0.5 1 calc R U P A 2

H27F H 0.5723 0.1541 0.7526 0.120 Uiso 0.5 1 calc R U P A 2

C28 C 0.5748(3) 0.24518(9) -0.2212(9) 0.0369(11) Uani 1 1 d . . . . .

H28A H 0.6066 0.2506 -0.3419 0.044 Uiso 1 1 calc R U . . .

H28B H 0.5441 0.2304 -0.2266 0.044 Uiso 1 1 calc R U . . .

Si2 Si -0.05522(10) 0.07666(3) 1.0515(3) 0.0481(4) Uani 1 1 d . . . . .

O6 O 0.3166(2) 0.13311(7) 0.9832(7) 0.0465(9) Uani 1 1 d . . . . .

O7 O 0.4162(3) 0.10518(7) 0.9015(8) 0.0548(11) Uani 1 1 d . . . . .

O8 O 0.2017(3) 0.15809(7) 0.9787(8) 0.0555(11) Uani 1 1 d . . . . .

O9 O 0.0337(2) 0.07454(8) 0.9077(7) 0.0556(11) Uani 1 1 d . . . . .

O10 O 0.3790(4) 0.01097(9) 0.9971(11) 0.0782(16) Uani 1 1 d . . . . .

C29 C 0.3547(3) 0.11621(9) 0.8446(10) 0.0427(13) Uani 1 1 d . . . . .

C30 C 0.3056(3) 0.11629(9) 0.6345(10) 0.0395(12) Uani 1 1 d . . . . .

H30 H 0.3378 0.1265 0.5301 0.047 Uiso 1 1 calc R U . . .

C31 C 0.2203(4) 0.12890(9) 0.6949(10) 0.0455(14) Uani 1 1 d . . . . .

H31 H 0.2026 0.1404 0.5806 0.055 Uiso 1 1 calc R U . . .

C32 C 0.2414(4) 0.14214(9) 0.8953(10) 0.0433(13) Uani 1 1 d . . . . .

C33 C 0.1469(4) 0.11071(9) 0.7383(12) 0.0508(16) Uani 1 1 d . . . . .

H33A H 0.1094 0.1172 0.8530 0.061 Uiso 1 1 calc R U . . .

H33B H 0.1108 0.1093 0.6085 0.061 Uiso 1 1 calc R U . . .

C34 C 0.1772(3) 0.08555(9) 0.8029(10) 0.0410(12) Uani 1 1 d . . . . .

C35 C 0.2447(3) 0.07556(9) 0.6977(9) 0.0398(12) Uani 1 1 d . . . . .

C36 C 0.2930(4) 0.09117(9) 0.5389(10) 0.0418(12) Uani 1 1 d . . . . .

H36 H 0.2542 0.0931 0.4121 0.050 Uiso 1 1 calc R U . . .

C37 C 0.3806(4) 0.08147(10) 0.4569(12) 0.0520(15) Uani 1 1 d . . . . .

H37A H 0.3951 0.0894 0.3204 0.062 Uiso 1 1 calc R U . . .

H37B H 0.4269 0.0855 0.5606 0.062 Uiso 1 1 calc R U . . .

C38 C 0.3781(4) 0.05436(10) 0.4238(12) 0.0554(17) Uani 1 1 d . . . . .

H38A H 0.3313 0.0501 0.3222 0.066 Uiso 1 1 calc R U . . .

H38B H 0.4343 0.0487 0.3647 0.066 Uiso 1 1 calc R U . . .

C39 C 0.3614(4) 0.04259(9) 0.6371(13) 0.0514(16) Uani 1 1 d . . . . .

H39 H 0.4071 0.0475 0.7417 0.062 Uiso 1 1 calc R U . . .

C40 C 0.2705(3) 0.04899(9) 0.7235(10) 0.0407(13) Uani 1 1 d . . . . .

H40 H 0.2684 0.0448 0.8783 0.049 Uiso 1 1 calc R U . . .

C41 C 0.2108(4) 0.03163(10) 0.6023(12) 0.0514(16) Uani 1 1 d . . . . .

C42 C 0.2642(4) 0.01014(10) 0.5318(15) 0.067(2) Uani 1 1 d . . . . .

H42A H 0.2644 0.0088 0.3746 0.081 Uiso 1 1 calc R U . . .

H42B H 0.2403 -0.0049 0.5925 0.081 Uiso 1 1 calc R U . . .

C43 C 0.3584(4) 0.01482(10) 0.6172(14) 0.0599(19) Uani 1 1 d . . . . .

H43A H 0.4015 0.0095 0.5074 0.072 Uiso 1 1 calc R U . . .

C44 C 0.3775(4) 0.00208(11) 0.8252(16) 0.063(2) Uani 1 1 d . . . . .

N2A N 0.3971(6) -0.02250(16) 0.8435(17) 0.034(2) Uiso 0.5 1 d . . P B 1

C45A C 0.3874(7) -0.0378(2) 0.659(2) 0.035(2) Uiso 0.5 1 d . . P B 1

H45A H 0.3699 -0.0330 0.5205 0.041 Uiso 0.5 1 calc R U P B 1

C46A C 0.4089(7) -0.06086(17) 0.725(2) 0.0270(19) Uiso 0.5 1 d . . P B 1

H46A H 0.4084 -0.0750 0.6393 0.032 Uiso 0.5 1 calc R U P B 1

C47A C 0.4326(8) -0.0594(2) 0.953(2) 0.046(3) Uiso 0.5 1 d . . P B 1

H47A H 0.4503 -0.0724 1.0415 0.056 Uiso 0.5 1 calc R U P B 1

C48A C 0.4244(8) -0.0364(2) 1.012(2) 0.041(3) Uiso 0.5 1 d . . P B 1

H48A H 0.4359 -0.0305 1.1511 0.049 Uiso 0.5 1 calc R U P B 1

N2B N 0.3917(8) -0.0236(2) 0.748(2) 0.057(3) Uiso 0.5 1 d . . P B 2

C45B C 0.3824(11) -0.0361(3) 0.563(3) 0.065(4) Uiso 0.5 1 d . . P B 2

H45B H 0.3671 -0.0299 0.4272 0.078 Uiso 0.5 1 calc R U P B 2

C46B C 0.3999(9) -0.0599(3) 0.614(3) 0.061(4) Uiso 0.5 1 d . . P B 2

H46B H 0.3981 -0.0731 0.5181 0.073 Uiso 0.5 1 calc R U P B 2

C47B C 0.4210(8) -0.0612(2) 0.836(3) 0.043(3) Uiso 0.5 1 d . . P B 2

H47B H 0.4360 -0.0754 0.9131 0.051 Uiso 0.5 1 calc R U P B 2

C48B C 0.4158(10) -0.0390(3) 0.917(3) 0.057(4) Uiso 0.5 1 d . . P B 2

H48B H 0.4263 -0.0344 1.0600 0.068 Uiso 0.5 1 calc R U P B 2

C49 C 0.1235(3) 0.07358(11) 0.9689(11) 0.0499(14) Uani 1 1 d . . . . .

H49A H 0.1419 0.0566 0.9851 0.060 Uiso 1 1 calc R U . . .

H49B H 0.1315 0.0818 1.1073 0.060 Uiso 1 1 calc R U . . .

C50 C -0.0283(5) 0.08324(12) 1.3352(12) 0.0677(19) Uani 1 1 d . . . . .

H50A H 0.0039 0.0697 1.3960 0.102 Uiso 1 1 calc R U . . .

H50B H -0.0822 0.0857 1.4158 0.102 Uiso 1 1 calc R U . . .

H50C H 0.0074 0.0978 1.3429 0.102 Uiso 1 1 calc R U . . .

C51 C -0.1223(5) 0.10115(14) 0.9371(13) 0.072(2) Uani 1 1 d . . . . .

H51A H -0.0874 0.1159 0.9270 0.108 Uiso 1 1 calc R U . . .

H51B H -0.1727 0.1041 1.0292 0.108 Uiso 1 1 calc R U . . .

H51C H -0.1423 0.0965 0.7949 0.108 Uiso 1 1 calc R U . . .

C52 C -0.1158(4) 0.04730(14) 1.0336(12) 0.076(2) Uani 1 1 d D . . . .

C53 C -0.0576(7) 0.02756(12) 1.139(2) 0.124(4) Uani 1 1 d D . . . .

H53A H 0.0005 0.0279 1.0742 0.186 Uiso 1 1 calc R U . . .

H53B H -0.0839 0.0117 1.1157 0.186 Uiso 1 1 calc R U . . .

H53C H -0.0528 0.0307 1.2918 0.186 Uiso 1 1 calc R U . . .

C54A C -0.1157(16) 0.0379(4) 0.798(2) 0.100(7) Uiso 0.5 1 d D . P C 1

H54A H -0.0556 0.0354 0.7514 0.150 Uiso 0.5 1 calc R U P C 1

H54B H -0.1438 0.0498 0.7061 0.150 Uiso 0.5 1 calc R U P C 1

H54C H -0.1477 0.0227 0.7908 0.150 Uiso 0.5 1 calc R U P C 1

C55A C -0.1984(13) 0.0556(5) 1.168(4) 0.115(9) Uiso 0.5 1 d D . P C 1

H55A H -0.2255 0.0415 1.2344 0.173 Uiso 0.5 1 calc R U P C 1

H55B H -0.2404 0.0635 1.0735 0.173 Uiso 0.5 1 calc R U P C 1

H55C H -0.1800 0.0669 1.2789 0.173 Uiso 0.5 1 calc R U P C 1

C54B C -0.1540(14) 0.0464(4) 0.804(2) 0.088(5) Uiso 0.5 1 d D . P C 2

H54D H -0.2032 0.0352 0.8002 0.132 Uiso 0.5 1 calc R U P C 2

H54E H -0.1090 0.0410 0.7045 0.132 Uiso 0.5 1 calc R U P C 2

H54F H -0.1740 0.0625 0.7627 0.132 Uiso 0.5 1 calc R U P C 2

C55B C -0.2046(8) 0.0464(3) 1.144(3) 0.066(4) Uiso 0.5 1 d D . P C 2

H55D H -0.2441 0.0579 1.0759 0.099 Uiso 0.5 1 calc R U P C 2

H55E H -0.1977 0.0506 1.2947 0.099 Uiso 0.5 1 calc R U P C 2

H55F H -0.2288 0.0302 1.1322 0.099 Uiso 0.5 1 calc R U P C 2

C56 C 0.1273(4) 0.03393(13) 0.5654(15) 0.072(2) Uani 1 1 d . . . . .

H56A H 0.0969 0.0217 0.4905 0.087 Uiso 1 1 calc R U . . .

H56B H 0.0972 0.0478 0.6135 0.087 Uiso 1 1 calc R U . . .


loop_

 _atom_site_aniso_label

 _atom_site_aniso_U_11

 _atom_site_aniso_U_22

 _atom_site_aniso_U_33

 _atom_site_aniso_U_23

 _atom_site_aniso_U_13

 _atom_site_aniso_U_12

Si1 0.0288(6) 0.0271(6) 0.0525(8) 0.0060(6) -0.0060(7) -0.0007(5)

O1 0.0447(19) 0.0289(16) 0.0396(18) 0.0034(15) -0.0061(17) -0.0029(15)

O2 0.093(3) 0.0307(19) 0.040(2) -0.0022(16) -0.010(2) -0.002(2)

O3 0.055(2) 0.0276(18) 0.051(2) 0.0079(16) 0.0049(19) -0.0016(16)

O4 0.0305(18) 0.0362(19) 0.067(3) 0.0200(18) -0.0039(18) -0.0012(15)

O5 0.0322(17) 0.0372(18) 0.053(2) 0.0030(16) -0.0092(18) 0.0014(15)

C1 0.038(3) 0.031(3) 0.038(3) 0.004(2) 0.001(2) -0.004(2)

C2 0.020(2) 0.029(2) 0.039(3) -0.002(2) -0.0004(19) -0.0043(17)

C3 0.024(2) 0.027(2) 0.044(3) -0.0003(19) -0.002(2) -0.0054(19)

C4 0.027(2) 0.032(3) 0.047(3) 0.000(2) 0.006(2) -0.0024(19)

C5 0.031(2) 0.027(2) 0.041(3) 0.001(2) 0.000(2) -0.0013(19)

C6 0.026(2) 0.034(2) 0.036(3) 0.003(2) 0.003(2) 0.0001(19)

C7 0.023(2) 0.031(2) 0.031(2) 0.0048(19) 0.0014(19) 0.0006(18)

C8 0.021(2) 0.028(2) 0.036(2) 0.0040(19) -0.002(2) -0.0004(17)

C9 0.021(2) 0.028(2) 0.047(3) 0.004(2) -0.002(2) 0.0042(18)

C10 0.026(2) 0.026(2) 0.043(3) 0.001(2) 0.000(2) 0.0024(18)

C11 0.024(2) 0.026(2) 0.039(3) 0.0037(19) 0.001(2) 0.0002(18)

C12 0.021(2) 0.027(2) 0.039(3) 0.0031(19) -0.005(2) 0.0031(17)

C13 0.021(2) 0.031(2) 0.044(3) 0.006(2) 0.001(2) 0.0058(18)

C14 0.027(2) 0.034(3) 0.040(3) 0.005(2) 0.005(2) -0.0011(19)

C15 0.027(2) 0.027(2) 0.038(2) 0.008(2) 0.000(2) -0.0013(18)

C16 0.027(2) 0.025(2) 0.047(3) 0.009(2) 0.003(2) -0.0035(19)

N1 0.0278(19) 0.029(2) 0.046(3) 0.0051(17) -0.0004(19) -0.0046(16)

C17 0.027(2) 0.035(3) 0.059(3) 0.002(2) -0.001(3) 0.000(2)

C18 0.038(3) 0.038(3) 0.065(4) -0.001(3) 0.008(3) 0.001(2)

C19 0.058(4) 0.034(3) 0.052(4) 0.001(2) 0.008(3) -0.004(3)

C20 0.045(3) 0.034(3) 0.045(3) 0.007(2) 0.003(3) -0.007(2)

C21 0.029(2) 0.031(2) 0.053(3) 0.010(2) 0.001(2) 0.008(2)

C22 0.049(3) 0.053(4) 0.056(4) -0.012(3) -0.008(3) -0.007(3)

C23 0.047(3) 0.061(4) 0.053(3) -0.003(3) -0.005(3) 0.007(3)

C24 0.036(3) 0.041(3) 0.082(5) 0.028(3) -0.017(3) -0.014(2)

C25 0.053(4) 0.036(3) 0.092(5) 0.021(3) -0.022(4) -0.004(3)

C28 0.030(2) 0.036(3) 0.045(3) 0.005(2) 0.004(2) -0.001(2)

Si2 0.0366(8) 0.0467(9) 0.0611(10) 0.0051(8) 0.0005(8) 0.0008(7)

O6 0.044(2) 0.041(2) 0.054(2) -0.0027(18) -0.0026(19) -0.0097(17)

O7 0.042(2) 0.042(2) 0.080(3) 0.009(2) -0.013(2) -0.0009(18)

O8 0.045(2) 0.045(2) 0.076(3) -0.017(2) 0.013(2) -0.0032(18)

O9 0.0270(18) 0.074(3) 0.066(3) -0.017(2) 0.0000(19) -0.0054(18)

O10 0.069(3) 0.050(3) 0.115(5) 0.005(3) 0.002(3) 0.013(2)

C29 0.039(3) 0.029(2) 0.060(3) 0.009(2) 0.000(3) -0.008(2)

C30 0.042(3) 0.026(2) 0.051(3) 0.002(2) -0.003(3) 0.001(2)

C31 0.044(3) 0.029(3) 0.064(4) -0.003(2) -0.008(3) 0.008(2)

C32 0.039(3) 0.036(3) 0.055(3) -0.001(2) 0.002(3) -0.008(2)

C33 0.033(3) 0.031(3) 0.089(5) -0.011(3) -0.012(3) 0.007(2)

C34 0.029(2) 0.031(2) 0.063(3) -0.006(2) -0.008(3) -0.001(2)

C35 0.033(3) 0.031(3) 0.055(3) -0.003(2) -0.005(2) 0.001(2)

C36 0.042(3) 0.026(2) 0.057(3) -0.002(2) 0.003(3) 0.000(2)

C37 0.048(3) 0.036(3) 0.072(4) -0.002(3) 0.015(3) -0.002(2)

C38 0.047(3) 0.041(3) 0.078(5) -0.014(3) 0.020(3) -0.001(3)

C39 0.034(3) 0.026(3) 0.094(5) -0.010(3) 0.005(3) 0.001(2)

C40 0.028(2) 0.029(3) 0.065(4) 0.003(2) -0.002(3) -0.003(2)

C41 0.039(3) 0.036(3) 0.079(5) -0.006(3) 0.000(3) -0.004(2)

C42 0.042(3) 0.034(3) 0.125(7) -0.016(4) -0.002(4) -0.007(2)

C43 0.036(3) 0.031(3) 0.113(6) -0.014(3) 0.012(4) -0.001(2)

C44 0.032(3) 0.032(3) 0.124(7) 0.010(4) 0.006(4) 0.006(2)

C49 0.026(2) 0.056(3) 0.068(4) -0.010(3) -0.001(3) 0.001(2)

C50 0.084(5) 0.054(4) 0.065(4) 0.004(3) 0.005(4) -0.001(4)

C51 0.070(4) 0.076(5) 0.071(5) 0.014(4) -0.008(4) 0.033(4)

C52 0.061(4) 0.075(5) 0.090(6) 0.011(4) -0.010(4) -0.030(4)

C53 0.128(8) 0.031(4) 0.213(13) 0.013(6) -0.024(10) -0.015(4)

C56 0.044(3) 0.053(4) 0.120(7) -0.028(4) -0.024(4) 0.004(3)


_geom_special_details

;

 All esds (except the esd in the dihedral angle between two l.s. planes)

 are estimated using the full covariance matrix.  The cell esds are taken

 into account individually in the estimation of esds in distances, angles

 and torsion angles; correlations between esds in cell parameters are only

 used when they are defined by crystal symmetry.  An approximate (isotropic)

 treatment of cell esds is used for estimating esds involving l.s. planes.

;


loop_

 _geom_bond_atom_site_label_1

 _geom_bond_atom_site_label_2

 _geom_bond_distance

 _geom_bond_site_symmetry_2

 _geom_bond_publ_flag

Si1 O4 1.649(4) . ?

Si1 C22 1.838(6) . ?

Si1 C24 1.859(5) . ?

Si1 C23 1.871(7) . ?

O1 C4 1.383(6) . ?

O1 C1 1.392(6) . ?

O2 C1 1.188(6) . ?

O3 C4 1.197(6) . ?

O4 C21 1.409(6) . ?

O5 C16 1.213(6) . ?

C1 C2 1.506(7) . ?

C2 C3 1.530(6) . ?

C2 C8 1.550(6) . ?

C2 H2 1.0000 . ?

C3 C4 1.498(7) . ?

C3 C5 1.553(7) . ?

C3 H3 1.0000 . ?

C5 C6 1.514(6) . ?

C5 H5A 0.9900 . ?

C5 H5B 0.9900 . ?

C6 C7 1.336(6) . ?

C6 C21 1.504(6) . ?

C7 C12 1.504(6) . ?

C7 C8 1.534(6) . ?

C8 C9 1.538(6) . ?

C8 H8 1.0000 . ?

C9 C10 1.525(6) . ?

C9 H9A 0.9900 . ?

C9 H9B 0.9900 . ?

C10 C11 1.526(7) . ?

C10 H10A 0.9900 . ?

C10 H10B 0.9900 . ?

C11 C12 1.550(6) . ?

C11 C15 1.569(6) . ?

C11 H11 1.0000 . ?

C12 C13 1.524(7) . ?

C12 H12 1.0000 . ?

C13 C28 1.314(7) . ?

C13 C14 1.512(7) . ?

C14 C15 1.543(7) . ?

C14 H14A 0.9900 . ?

C14 H14B 0.9900 . ?

C15 C16 1.506(7) . ?

C15 H15 1.0000 . ?

C16 N1 1.410(6) . ?

N1 C20 1.377(7) . ?

N1 C17 1.399(6) . ?

C17 C18 1.350(8) . ?

C17 H17 0.9500 . ?

C18 C19 1.423(9) . ?

C18 H18 0.9500 . ?

C19 C20 1.343(8) . ?

C19 H19 0.9500 . ?

C20 H20 0.9500 . ?

C21 H21A 0.9900 . ?

C21 H21B 0.9900 . ?

C22 H22A 0.9800 . ?

C22 H22B 0.9800 . ?

C22 H22C 0.9800 . ?

C23 H23A 0.9800 . ?

C23 H23B 0.9800 . ?

C23 H23C 0.9800 . ?

C24 C27B 1.509(10) . ?

C24 C26A 1.510(9) . ?

C24 C25 1.538(6) . ?

C24 C26B 1.578(9) . ?

C24 C27A 1.585(9) . ?

C25 H25A 0.9800 . ?

C25 H25B 0.9800 . ?

C25 H25C 0.9800 . ?

C26A H26A 0.9800 . ?

C26A H26B 0.9800 . ?

C26A H26C 0.9800 . ?

C27A H27A 0.9800 . ?

C27A H27B 0.9800 . ?

C27A H27C 0.9800 . ?

C26B H26D 0.9800 . ?

C26B H26E 0.9800 . ?

C26B H26F 0.9800 . ?

C27B H27D 0.9800 . ?

C27B H27E 0.9800 . ?

C27B H27F 0.9800 . ?

C28 H28A 0.9500 . ?

C28 H28B 0.9500 . ?

Si2 O9 1.642(4) . ?

Si2 C51 1.853(6) . ?

Si2 C50 1.865(8) . ?

Si2 C52 1.882(7) . ?

O6 C32 1.375(7) . ?

O6 C29 1.408(7) . ?

O7 C29 1.183(7) . ?

O8 C32 1.196(7) . ?

O9 C49 1.433(6) . ?

O10 C44 1.187(10) . ?

C29 C30 1.520(8) . ?

C30 C36 1.532(7) . ?

C30 C31 1.533(7) . ?

C30 H30 1.0000 . ?

C31 C32 1.494(8) . ?

C31 C33 1.539(8) . ?

C31 H31 1.0000 . ?

C33 C34 1.529(7) . ?

C33 H33A 0.9900 . ?

C33 H33B 0.9900 . ?

C34 C35 1.349(8) . ?

C34 C49 1.487(8) . ?

C35 C36 1.516(8) . ?

C35 C40 1.537(7) . ?

C36 C37 1.539(8) . ?

C36 H36 1.0000 . ?

C37 C38 1.521(7) . ?

C37 H37A 0.9900 . ?

C37 H37B 0.9900 . ?

C38 C39 1.513(10) . ?

C38 H38A 0.9900 . ?

C38 H38B 0.9900 . ?

C39 C40 1.540(7) . ?

C39 C43 1.549(7) . ?

C39 H39 1.0000 . ?

C40 C41 1.533(8) . ?

C40 H40 1.0000 . ?

C41 C56 1.310(8) . ?

C41 C42 1.515(8) . ?

C42 C43 1.565(9) . ?

C42 H42A 0.9900 . ?

C42 H42B 0.9900 . ?

C43 C44 1.515(12) . ?

C43 H43A 1.0000 . ?

C44 N2A 1.403(11) . ?

C44 N2B 1.521(14) . ?

N2A C48A 1.376(17) . ?

N2A C45A 1.443(15) . ?

C45A C46A 1.387(16) . ?

C45A H45A 0.9500 . ?

C46A C47A 1.483(17) . ?

C46A H46A 0.9500 . ?

C47A C48A 1.334(18) . ?

C47A H47A 0.9500 . ?

C48A H48A 0.9500 . ?

N2B C45B 1.37(2) . ?

N2B C48B 1.41(2) . ?

C45B C46B 1.39(2) . ?

C45B H45B 0.9500 . ?

C46B C47B 1.44(2) . ?

C46B H46B 0.9500 . ?

C47B C48B 1.34(2) . ?

C47B H47B 0.9500 . ?

C48B H48B 0.9500 . ?

C49 H49A 0.9900 . ?

C49 H49B 0.9900 . ?

C50 H50A 0.9800 . ?

C50 H50B 0.9800 . ?

C50 H50C 0.9800 . ?

C51 H51A 0.9800 . ?

C51 H51B 0.9800 . ?

C51 H51C 0.9800 . ?

C52 C55B 1.532(10) . ?

C52 C54B 1.558(11) . ?

C52 C53 1.561(9) . ?

C52 C54A 1.566(11) . ?

C52 C55A 1.593(11) . ?

C53 H53A 0.9800 . ?

C53 H53B 0.9800 . ?

C53 H53C 0.9800 . ?

C54A H54A 0.9800 . ?

C54A H54B 0.9800 . ?

C54A H54C 0.9800 . ?

C55A H55A 0.9800 . ?

C55A H55B 0.9800 . ?

C55A H55C 0.9800 . ?

C54B H54D 0.9800 . ?

C54B H54E 0.9800 . ?

C54B H54F 0.9800 . ?

C55B H55D 0.9800 . ?

C55B H55E 0.9800 . ?

C55B H55F 0.9800 . ?

C56 H56A 0.9500 . ?

C56 H56B 0.9500 . ?


loop_

 _geom_angle_atom_site_label_1

 _geom_angle_atom_site_label_2

 _geom_angle_atom_site_label_3

 _geom_angle

 _geom_angle_site_symmetry_1

 _geom_angle_site_symmetry_3

 _geom_angle_publ_flag

O4 Si1 C22 109.8(3) . . ?

O4 Si1 C24 103.8(2) . . ?

C22 Si1 C24 114.8(3) . . ?

O4 Si1 C23 110.8(3) . . ?

C22 Si1 C23 106.9(3) . . ?

C24 Si1 C23 110.8(3) . . ?

C4 O1 C1 109.7(4) . . ?

C21 O4 Si1 125.5(3) . . ?

O2 C1 O1 119.4(5) . . ?

O2 C1 C2 130.4(5) . . ?

O1 C1 C2 110.2(4) . . ?

C1 C2 C3 104.2(4) . . ?

C1 C2 C8 112.6(4) . . ?

C3 C2 C8 112.7(4) . . ?

C1 C2 H2 109.1 . . ?

C3 C2 H2 109.1 . . ?

C8 C2 H2 109.1 . . ?

C4 C3 C2 103.7(4) . . ?

C4 C3 C5 110.3(4) . . ?

C2 C3 C5 112.5(4) . . ?

C4 C3 H3 110.1 . . ?

C2 C3 H3 110.1 . . ?

C5 C3 H3 110.1 . . ?

O3 C4 O1 119.5(5) . . ?

O3 C4 C3 129.7(5) . . ?

O1 C4 C3 110.7(4) . . ?

C6 C5 C3 111.5(4) . . ?

C6 C5 H5A 109.3 . . ?

C3 C5 H5A 109.3 . . ?

C6 C5 H5B 109.3 . . ?

C3 C5 H5B 109.3 . . ?

H5A C5 H5B 108.0 . . ?

C7 C6 C21 123.9(4) . . ?

C7 C6 C5 119.2(4) . . ?

C21 C6 C5 116.7(4) . . ?

C6 C7 C12 123.3(4) . . ?

C6 C7 C8 115.9(4) . . ?

C12 C7 C8 120.8(4) . . ?

C7 C8 C9 116.8(4) . . ?

C7 C8 C2 107.0(4) . . ?

C9 C8 C2 111.4(4) . . ?

C7 C8 H8 107.0 . . ?

C9 C8 H8 107.0 . . ?

C2 C8 H8 107.0 . . ?

C10 C9 C8 113.3(4) . . ?

C10 C9 H9A 108.9 . . ?

C8 C9 H9A 108.9 . . ?

C10 C9 H9B 108.9 . . ?

C8 C9 H9B 108.9 . . ?

H9A C9 H9B 107.7 . . ?

C9 C10 C11 108.6(4) . . ?

C9 C10 H10A 110.0 . . ?

C11 C10 H10A 110.0 . . ?

C9 C10 H10B 110.0 . . ?

C11 C10 H10B 110.0 . . ?

H10A C10 H10B 108.3 . . ?

C10 C11 C12 109.8(4) . . ?

C10 C11 C15 112.3(4) . . ?

C12 C11 C15 103.8(4) . . ?

C10 C11 H11 110.2 . . ?

C12 C11 H11 110.2 . . ?

C15 C11 H11 110.2 . . ?

C7 C12 C13 116.7(4) . . ?

C7 C12 C11 115.1(4) . . ?

C13 C12 C11 101.1(4) . . ?

C7 C12 H12 107.8 . . ?

C13 C12 H12 107.8 . . ?

C11 C12 H12 107.8 . . ?

C28 C13 C14 126.6(5) . . ?

C28 C13 C12 127.9(4) . . ?

C14 C13 C12 105.3(4) . . ?

C13 C14 C15 105.3(4) . . ?

C13 C14 H14A 110.7 . . ?

C15 C14 H14A 110.7 . . ?

C13 C14 H14B 110.7 . . ?

C15 C14 H14B 110.7 . . ?

H14A C14 H14B 108.8 . . ?

C16 C15 C14 113.0(4) . . ?

C16 C15 C11 109.3(4) . . ?

C14 C15 C11 105.8(4) . . ?

C16 C15 H15 109.6 . . ?

C14 C15 H15 109.6 . . ?

C11 C15 H15 109.6 . . ?

O5 C16 N1 119.0(5) . . ?

O5 C16 C15 125.0(5) . . ?

N1 C16 C15 115.9(4) . . ?

C20 N1 C17 108.1(5) . . ?

C20 N1 C16 123.6(4) . . ?

C17 N1 C16 128.2(5) . . ?

C18 C17 N1 107.8(5) . . ?

C18 C17 H17 126.1 . . ?

N1 C17 H17 126.1 . . ?

C17 C18 C19 107.6(5) . . ?

C17 C18 H18 126.2 . . ?

C19 C18 H18 126.2 . . ?

C20 C19 C18 108.1(5) . . ?

C20 C19 H19 125.9 . . ?

C18 C19 H19 125.9 . . ?

C19 C20 N1 108.4(5) . . ?

C19 C20 H20 125.8 . . ?

N1 C20 H20 125.8 . . ?

O4 C21 C6 109.8(4) . . ?

O4 C21 H21A 109.7 . . ?

C6 C21 H21A 109.7 . . ?

O4 C21 H21B 109.7 . . ?

C6 C21 H21B 109.7 . . ?

H21A C21 H21B 108.2 . . ?

Si1 C22 H22A 109.5 . . ?

Si1 C22 H22B 109.5 . . ?

H22A C22 H22B 109.5 . . ?

Si1 C22 H22C 109.5 . . ?

H22A C22 H22C 109.5 . . ?

H22B C22 H22C 109.5 . . ?

Si1 C23 H23A 109.5 . . ?

Si1 C23 H23B 109.5 . . ?

H23A C23 H23B 109.5 . . ?

Si1 C23 H23C 109.5 . . ?

H23A C23 H23C 109.5 . . ?

H23B C23 H23C 109.5 . . ?

C27B C24 C25 107.7(10) . . ?

C26A C24 C25 116.6(7) . . ?

C27B C24 C26B 106.8(10) . . ?

C25 C24 C26B 104.1(6) . . ?

C26A C24 C27A 99.8(9) . . ?

C25 C24 C27A 108.7(7) . . ?

C27B C24 Si1 119.7(9) . . ?

C26A C24 Si1 115.7(7) . . ?

C25 C24 Si1 110.5(4) . . ?

C26B C24 Si1 106.9(6) . . ?

C27A C24 Si1 104.0(6) . . ?

C24 C25 H25A 109.5 . . ?

C24 C25 H25B 109.5 . . ?

H25A C25 H25B 109.5 . . ?

C24 C25 H25C 109.5 . . ?

H25A C25 H25C 109.5 . . ?

H25B C25 H25C 109.5 . . ?

C24 C26A H26A 109.5 . . ?

C24 C26A H26B 109.5 . . ?

H26A C26A H26B 109.5 . . ?

C24 C26A H26C 109.5 . . ?

H26A C26A H26C 109.5 . . ?

H26B C26A H26C 109.5 . . ?

C24 C27A H27A 109.5 . . ?

C24 C27A H27B 109.5 . . ?

H27A C27A H27B 109.5 . . ?

C24 C27A H27C 109.5 . . ?

H27A C27A H27C 109.5 . . ?

H27B C27A H27C 109.5 . . ?

C24 C26B H26D 109.5 . . ?

C24 C26B H26E 109.5 . . ?

H26D C26B H26E 109.5 . . ?

C24 C26B H26F 109.5 . . ?

H26D C26B H26F 109.5 . . ?

H26E C26B H26F 109.5 . . ?

C24 C27B H27D 109.5 . . ?

C24 C27B H27E 109.5 . . ?

H27D C27B H27E 109.5 . . ?

C24 C27B H27F 109.5 . . ?

H27D C27B H27F 109.5 . . ?

H27E C27B H27F 109.5 . . ?

C13 C28 H28A 120.0 . . ?

C13 C28 H28B 120.0 . . ?

H28A C28 H28B 120.0 . . ?

O9 Si2 C51 107.6(3) . . ?

O9 Si2 C50 110.8(3) . . ?

C51 Si2 C50 110.5(4) . . ?

O9 Si2 C52 108.5(3) . . ?

C51 Si2 C52 109.8(4) . . ?

C50 Si2 C52 109.7(3) . . ?

C32 O6 C29 110.2(4) . . ?

C49 O9 Si2 131.0(4) . . ?

O7 C29 O6 119.5(6) . . ?

O7 C29 C30 131.4(6) . . ?

O6 C29 C30 109.2(4) . . ?

C29 C30 C36 113.6(4) . . ?

C29 C30 C31 102.2(5) . . ?

C36 C30 C31 113.9(4) . . ?

C29 C30 H30 109.0 . . ?

C36 C30 H30 109.0 . . ?

C31 C30 H30 109.0 . . ?

C32 C31 C30 104.4(5) . . ?

C32 C31 C33 109.4(5) . . ?

C30 C31 C33 111.7(4) . . ?

C32 C31 H31 110.4 . . ?

C30 C31 H31 110.4 . . ?

C33 C31 H31 110.4 . . ?

O8 C32 O6 121.5(5) . . ?

O8 C32 C31 128.5(6) . . ?

O6 C32 C31 109.9(5) . . ?

C34 C33 C31 115.1(4) . . ?

C34 C33 H33A 108.5 . . ?

C31 C33 H33A 108.5 . . ?

C34 C33 H33B 108.5 . . ?

C31 C33 H33B 108.5 . . ?

H33A C33 H33B 107.5 . . ?

C35 C34 C49 125.9(5) . . ?

C35 C34 C33 118.7(5) . . ?

C49 C34 C33 115.2(5) . . ?

C34 C35 C36 117.6(5) . . ?

C34 C35 C40 122.8(5) . . ?

C36 C35 C40 119.5(5) . . ?

C35 C36 C30 109.0(5) . . ?

C35 C36 C37 116.6(5) . . ?

C30 C36 C37 109.9(4) . . ?

C35 C36 H36 107.0 . . ?

C30 C36 H36 107.0 . . ?

C37 C36 H36 107.0 . . ?

C38 C37 C36 111.8(5) . . ?

C38 C37 H37A 109.3 . . ?

C36 C37 H37A 109.3 . . ?

C38 C37 H37B 109.3 . . ?

C36 C37 H37B 109.3 . . ?

H37A C37 H37B 107.9 . . ?

C39 C38 C37 108.1(5) . . ?

C39 C38 H38A 110.1 . . ?

C37 C38 H38A 110.1 . . ?

C39 C38 H38B 110.1 . . ?

C37 C38 H38B 110.1 . . ?

H38A C38 H38B 108.4 . . ?

C38 C39 C40 111.5(5) . . ?

C38 C39 C43 111.3(6) . . ?

C40 C39 C43 103.4(4) . . ?

C38 C39 H39 110.1 . . ?

C40 C39 H39 110.1 . . ?

C43 C39 H39 110.1 . . ?

C41 C40 C35 113.4(5) . . ?

C41 C40 C39 102.9(5) . . ?

C35 C40 C39 114.7(4) . . ?

C41 C40 H40 108.5 . . ?

C35 C40 H40 108.5 . . ?

C39 C40 H40 108.5 . . ?

C56 C41 C42 123.8(6) . . ?

C56 C41 C40 127.8(6) . . ?

C42 C41 C40 108.4(5) . . ?

C41 C42 C43 105.7(5) . . ?

C41 C42 H42A 110.6 . . ?

C43 C42 H42A 110.6 . . ?

C41 C42 H42B 110.6 . . ?

C43 C42 H42B 110.6 . . ?

H42A C42 H42B 108.7 . . ?

C44 C43 C39 113.0(6) . . ?

C44 C43 C42 113.4(6) . . ?

C39 C43 C42 102.8(5) . . ?

C44 C43 H43A 109.2 . . ?

C39 C43 H43A 109.2 . . ?

C42 C43 H43A 109.2 . . ?

O10 C44 N2A 109.1(8) . . ?

O10 C44 C43 126.4(6) . . ?

N2A C44 C43 124.6(9) . . ?

O10 C44 N2B 132.5(9) . . ?

C43 C44 N2B 101.1(8) . . ?

C48A N2A C44 132.5(11) . . ?

C48A N2A C45A 108.5(9) . . ?

C44 N2A C45A 119.0(10) . . ?

C46A C45A N2A 106.3(11) . . ?

C46A C45A H45A 126.8 . . ?

N2A C45A H45A 126.8 . . ?

C45A C46A C47A 107.1(10) . . ?

C45A C46A H46A 126.5 . . ?

C47A C46A H46A 126.5 . . ?

C48A C47A C46A 107.4(11) . . ?

C48A C47A H47A 126.3 . . ?

C46A C47A H47A 126.3 . . ?

C47A C48A N2A 110.7(13) . . ?

C47A C48A H48A 124.7 . . ?

N2A C48A H48A 124.7 . . ?

C45B N2B C48B 110.9(14) . . ?

C45B N2B C44 137.2(13) . . ?

C48B N2B C44 111.7(13) . . ?

N2B C45B C46B 105.6(16) . . ?

N2B C45B H45B 127.2 . . ?

C46B C45B H45B 127.2 . . ?

C45B C46B C47B 108.5(15) . . ?

C45B C46B H46B 125.8 . . ?

C47B C46B H46B 125.8 . . ?

C48B C47B C46B 107.8(14) . . ?

C48B C47B H47B 126.1 . . ?

C46B C47B H47B 126.1 . . ?

C47B C48B N2B 107.2(15) . . ?

C47B C48B H48B 126.4 . . ?

N2B C48B H48B 126.4 . . ?

O9 C49 C34 109.3(5) . . ?

O9 C49 H49A 109.8 . . ?

C34 C49 H49A 109.8 . . ?

O9 C49 H49B 109.8 . . ?

C34 C49 H49B 109.8 . . ?

H49A C49 H49B 108.3 . . ?

Si2 C50 H50A 109.5 . . ?

Si2 C50 H50B 109.5 . . ?

H50A C50 H50B 109.5 . . ?

Si2 C50 H50C 109.5 . . ?

H50A C50 H50C 109.5 . . ?

H50B C50 H50C 109.5 . . ?

Si2 C51 H51A 109.5 . . ?

Si2 C51 H51B 109.5 . . ?

H51A C51 H51B 109.5 . . ?

Si2 C51 H51C 109.5 . . ?

H51A C51 H51C 109.5 . . ?

H51B C51 H51C 109.5 . . ?

C55B C52 C54B 94.7(11) . . ?

C55B C52 C53 107.3(9) . . ?

C54B C52 C53 125.8(11) . . ?

C53 C52 C54A 99.4(11) . . ?

C53 C52 C55A 115.9(13) . . ?

C54A C52 C55A 126.6(15) . . ?

C55B C52 Si2 116.2(9) . . ?

C54B C52 Si2 105.6(9) . . ?

C53 C52 Si2 107.5(5) . . ?

C54A C52 Si2 110.1(10) . . ?

C55A C52 Si2 96.4(10) . . ?

C52 C53 H53A 109.5 . . ?

C52 C53 H53B 109.5 . . ?

H53A C53 H53B 109.5 . . ?

C52 C53 H53C 109.5 . . ?

H53A C53 H53C 109.5 . . ?

H53B C53 H53C 109.5 . . ?

C52 C54A H54A 109.5 . . ?

C52 C54A H54B 109.5 . . ?

H54A C54A H54B 109.5 . . ?

C52 C54A H54C 109.5 . . ?

H54A C54A H54C 109.5 . . ?

H54B C54A H54C 109.5 . . ?

C52 C55A H55A 109.5 . . ?

C52 C55A H55B 109.5 . . ?

H55A C55A H55B 109.5 . . ?

C52 C55A H55C 109.5 . . ?

H55A C55A H55C 109.5 . . ?

H55B C55A H55C 109.5 . . ?

C52 C54B H54D 109.5 . . ?

C52 C54B H54E 109.5 . . ?

H54D C54B H54E 109.5 . . ?

C52 C54B H54F 109.5 . . ?

H54D C54B H54F 109.5 . . ?

H54E C54B H54F 109.5 . . ?

C52 C55B H55D 109.5 . . ?

C52 C55B H55E 109.5 . . ?

H55D C55B H55E 109.5 . . ?

C52 C55B H55F 109.5 . . ?

H55D C55B H55F 109.5 . . ?

H55E C55B H55F 109.5 . . ?

C41 C56 H56A 120.0 . . ?

C41 C56 H56B 120.0 . . ?

H56A C56 H56B 120.0 . . ?


loop_

 _geom_torsion_atom_site_label_1

 _geom_torsion_atom_site_label_2

 _geom_torsion_atom_site_label_3

 _geom_torsion_atom_site_label_4

 _geom_torsion

 _geom_torsion_site_symmetry_1

 _geom_torsion_site_symmetry_2

 _geom_torsion_site_symmetry_3

 _geom_torsion_site_symmetry_4

 _geom_torsion_publ_flag

C22 Si1 O4 C21 66.6(5) . . . . ?

C24 Si1 O4 C21 -170.2(5) . . . . ?

C23 Si1 O4 C21 -51.2(5) . . . . ?

C4 O1 C1 O2 178.2(5) . . . . ?

C4 O1 C1 C2 -1.4(5) . . . . ?

O2 C1 C2 C3 174.1(6) . . . . ?

O1 C1 C2 C3 -6.3(5) . . . . ?

O2 C1 C2 C8 51.7(8) . . . . ?

O1 C1 C2 C8 -128.7(4) . . . . ?

C1 C2 C3 C4 10.8(5) . . . . ?

C8 C2 C3 C4 133.1(4) . . . . ?

C1 C2 C3 C5 -108.4(4) . . . . ?

C8 C2 C3 C5 14.0(6) . . . . ?

C1 O1 C4 O3 -173.1(4) . . . . ?

C1 O1 C4 C3 9.0(5) . . . . ?

C2 C3 C4 O3 169.9(5) . . . . ?

C5 C3 C4 O3 -69.4(7) . . . . ?

C2 C3 C4 O1 -12.5(5) . . . . ?

C5 C3 C4 O1 108.2(4) . . . . ?

C4 C3 C5 C6 -79.1(5) . . . . ?

C2 C3 C5 C6 36.1(6) . . . . ?

C3 C5 C6 C7 -46.6(6) . . . . ?

C3 C5 C6 C21 138.2(5) . . . . ?

C21 C6 C7 C12 -1.8(8) . . . . ?

C5 C6 C7 C12 -176.6(5) . . . . ?

C21 C6 C7 C8 175.4(5) . . . . ?

C5 C6 C7 C8 0.5(7) . . . . ?

C6 C7 C8 C9 176.9(5) . . . . ?

C12 C7 C8 C9 -5.9(7) . . . . ?

C6 C7 C8 C2 51.3(6) . . . . ?

C12 C7 C8 C2 -131.5(4) . . . . ?

C1 C2 C8 C7 60.2(5) . . . . ?

C3 C2 C8 C7 -57.3(5) . . . . ?

C1 C2 C8 C9 -68.6(5) . . . . ?

C3 C2 C8 C9 173.9(4) . . . . ?

C7 C8 C9 C10 27.6(6) . . . . ?

C2 C8 C9 C10 151.1(4) . . . . ?

C8 C9 C10 C11 -58.3(6) . . . . ?

C9 C10 C11 C12 66.8(5) . . . . ?

C9 C10 C11 C15 -178.2(4) . . . . ?

C6 C7 C12 C13 73.5(6) . . . . ?

C8 C7 C12 C13 -103.6(5) . . . . ?

C6 C7 C12 C11 -168.3(5) . . . . ?

C8 C7 C12 C11 14.7(7) . . . . ?

C10 C11 C12 C7 -44.7(6) . . . . ?

C15 C11 C12 C7 -165.0(4) . . . . ?

C10 C11 C12 C13 81.9(4) . . . . ?

C15 C11 C12 C13 -38.3(5) . . . . ?

C7 C12 C13 C28 -5.9(7) . . . . ?

C11 C12 C13 C28 -131.5(5) . . . . ?

C7 C12 C13 C14 169.1(4) . . . . ?

C11 C12 C13 C14 43.6(4) . . . . ?

C28 C13 C14 C15 143.8(5) . . . . ?

C12 C13 C14 C15 -31.3(5) . . . . ?

C13 C14 C15 C16 125.9(4) . . . . ?

C13 C14 C15 C11 6.5(5) . . . . ?

C10 C11 C15 C16 139.5(4) . . . . ?

C12 C11 C15 C16 -101.9(4) . . . . ?

C10 C11 C15 C14 -98.6(4) . . . . ?

C12 C11 C15 C14 20.0(5) . . . . ?

C14 C15 C16 O5 -21.4(6) . . . . ?

C11 C15 C16 O5 96.0(5) . . . . ?

C14 C15 C16 N1 162.7(4) . . . . ?

C11 C15 C16 N1 -79.9(5) . . . . ?

O5 C16 N1 C20 -3.5(7) . . . . ?

C15 C16 N1 C20 172.6(4) . . . . ?

O5 C16 N1 C17 -178.9(5) . . . . ?

C15 C16 N1 C17 -2.8(7) . . . . ?

C20 N1 C17 C18 0.3(6) . . . . ?

C16 N1 C17 C18 176.3(5) . . . . ?

N1 C17 C18 C19 -0.2(6) . . . . ?

C17 C18 C19 C20 0.0(7) . . . . ?

C18 C19 C20 N1 0.3(6) . . . . ?

C17 N1 C20 C19 -0.4(5) . . . . ?

C16 N1 C20 C19 -176.5(5) . . . . ?

Si1 O4 C21 C6 -170.3(4) . . . . ?

C7 C6 C21 O4 144.2(5) . . . . ?

C5 C6 C21 O4 -40.9(7) . . . . ?

O4 Si1 C24 C27B -55.8(10) . . . . ?

C22 Si1 C24 C27B 64.1(10) . . . . ?

C23 Si1 C24 C27B -174.8(10) . . . . ?

O4 Si1 C24 C26A 43.0(8) . . . . ?

C22 Si1 C24 C26A 162.9(8) . . . . ?

C23 Si1 C24 C26A -76.0(8) . . . . ?

O4 Si1 C24 C25 178.3(5) . . . . ?

C22 Si1 C24 C25 -61.9(6) . . . . ?

C23 Si1 C24 C25 59.3(5) . . . . ?

O4 Si1 C24 C26B 65.6(6) . . . . ?

C22 Si1 C24 C26B -174.5(6) . . . . ?

C23 Si1 C24 C26B -53.4(6) . . . . ?

O4 Si1 C24 C27A -65.3(7) . . . . ?

C22 Si1 C24 C27A 54.6(7) . . . . ?

C23 Si1 C24 C27A 175.7(7) . . . . ?

C51 Si2 O9 C49 130.7(6) . . . . ?

C50 Si2 O9 C49 9.8(6) . . . . ?

C52 Si2 O9 C49 -110.6(6) . . . . ?

C32 O6 C29 O7 -174.1(5) . . . . ?

C32 O6 C29 C30 7.2(5) . . . . ?

O7 C29 C30 C36 41.2(8) . . . . ?

O6 C29 C30 C36 -140.3(4) . . . . ?

O7 C29 C30 C31 164.3(6) . . . . ?

O6 C29 C30 C31 -17.2(5) . . . . ?

C29 C30 C31 C32 19.9(5) . . . . ?

C36 C30 C31 C32 142.9(5) . . . . ?

C29 C30 C31 C33 -98.2(5) . . . . ?

C36 C30 C31 C33 24.7(7) . . . . ?

C29 O6 C32 O8 -174.4(5) . . . . ?

C29 O6 C32 C31 6.6(6) . . . . ?

C30 C31 C32 O8 163.8(6) . . . . ?

C33 C31 C32 O8 -76.5(7) . . . . ?

C30 C31 C32 O6 -17.2(6) . . . . ?

C33 C31 C32 O6 102.4(5) . . . . ?

C32 C31 C33 C34 -91.3(6) . . . . ?

C30 C31 C33 C34 23.8(8) . . . . ?

C31 C33 C34 C35 -42.6(8) . . . . ?

C31 C33 C34 C49 141.9(6) . . . . ?

C49 C34 C35 C36 -178.1(5) . . . . ?

C33 C34 C35 C36 7.0(8) . . . . ?

C49 C34 C35 C40 5.5(9) . . . . ?

C33 C34 C35 C40 -169.5(5) . . . . ?

C34 C35 C36 C30 42.2(7) . . . . ?

C40 C35 C36 C30 -141.2(5) . . . . ?

C34 C35 C36 C37 167.3(5) . . . . ?

C40 C35 C36 C37 -16.1(8) . . . . ?

C29 C30 C36 C35 58.0(6) . . . . ?

C31 C30 C36 C35 -58.5(6) . . . . ?

C29 C30 C36 C37 -71.0(7) . . . . ?

C31 C30 C36 C37 172.6(5) . . . . ?

C35 C36 C37 C38 37.9(8) . . . . ?

C30 C36 C37 C38 162.5(6) . . . . ?

C36 C37 C38 C39 -62.4(7) . . . . ?

C37 C38 C39 C40 65.4(6) . . . . ?

C37 C38 C39 C43 -179.7(5) . . . . ?

C34 C35 C40 C41 77.0(7) . . . . ?

C36 C35 C40 C41 -99.4(6) . . . . ?

C34 C35 C40 C39 -165.1(6) . . . . ?

C36 C35 C40 C39 18.4(8) . . . . ?

C38 C39 C40 C41 80.6(6) . . . . ?

C43 C39 C40 C41 -39.1(7) . . . . ?

C38 C39 C40 C35 -43.0(7) . . . . ?

C43 C39 C40 C35 -162.8(6) . . . . ?

C35 C40 C41 C56 -33.0(11) . . . . ?

C39 C40 C41 C56 -157.5(8) . . . . ?

C35 C40 C41 C42 148.2(6) . . . . ?

C39 C40 C41 C42 23.7(7) . . . . ?

C56 C41 C42 C43 -178.0(8) . . . . ?

C40 C41 C42 C43 0.8(8) . . . . ?

C38 C39 C43 C44 157.2(5) . . . . ?

C40 C39 C43 C44 -83.0(6) . . . . ?

C38 C39 C43 C42 -80.2(7) . . . . ?

C40 C39 C43 C42 39.6(8) . . . . ?

C41 C42 C43 C44 97.5(7) . . . . ?

C41 C42 C43 C39 -24.8(8) . . . . ?

C39 C43 C44 O10 13.8(9) . . . . ?

C42 C43 C44 O10 -102.6(8) . . . . ?

C39 C43 C44 N2A -165.9(6) . . . . ?

C42 C43 C44 N2A 77.7(8) . . . . ?

C39 C43 C44 N2B -167.0(6) . . . . ?

C42 C43 C44 N2B 76.6(7) . . . . ?

O10 C44 N2A C48A -7.4(14) . . . . ?

C43 C44 N2A C48A 172.3(10) . . . . ?

N2B C44 N2A C48A 175(3) . . . . ?

O10 C44 N2A C45A 171.5(8) . . . . ?

C43 C44 N2A C45A -8.8(12) . . . . ?

N2B C44 N2A C45A -6.1(14) . . . . ?

C48A N2A C45A C46A 0.6(12) . . . . ?

C44 N2A C45A C46A -178.6(8) . . . . ?

N2A C45A C46A C47A -0.4(11) . . . . ?

C45A C46A C47A C48A 0.1(13) . . . . ?

C46A C47A C48A N2A 0.2(14) . . . . ?

C44 N2A C48A C47A 178.5(10) . . . . ?

C45A N2A C48A C47A -0.5(13) . . . . ?

O10 C44 N2B C45B 170.8(15) . . . . ?

N2A C44 N2B C45B 174(3) . . . . ?

C43 C44 N2B C45B -8.3(19) . . . . ?

O10 C44 N2B C48B -4.1(16) . . . . ?

N2A C44 N2B C48B -1.1(13) . . . . ?

C43 C44 N2B C48B 176.7(10) . . . . ?

C48B N2B C45B C46B 0.6(18) . . . . ?

C44 N2B C45B C46B -174.4(13) . . . . ?

N2B C45B C46B C47B -0.6(17) . . . . ?

C45B C46B C47B C48B 0.4(17) . . . . ?

C46B C47B C48B N2B 0.0(15) . . . . ?

C45B N2B C48B C47B -0.4(17) . . . . ?

C44 N2B C48B C47B 176.0(10) . . . . ?

Si2 O9 C49 C34 -147.3(4) . . . . ?

C35 C34 C49 O9 -124.2(6) . . . . ?

C33 C34 C49 O9 50.9(6) . . . . ?

O9 Si2 C52 C55B -175.4(9) . . . . ?

C51 Si2 C52 C55B -58.1(10) . . . . ?

C50 Si2 C52 C55B 63.5(9) . . . . ?

O9 Si2 C52 C54B -72.0(9) . . . . ?

C51 Si2 C52 C54B 45.4(10) . . . . ?

C50 Si2 C52 C54B 166.9(9) . . . . ?

O9 Si2 C52 C53 64.5(7) . . . . ?

C51 Si2 C52 C53 -178.2(7) . . . . ?

C50 Si2 C52 C53 -56.6(8) . . . . ?

O9 Si2 C52 C54A -42.9(11) . . . . ?

C51 Si2 C52 C54A 74.4(11) . . . . ?

C50 Si2 C52 C54A -164.0(10) . . . . ?

O9 Si2 C52 C55A -175.8(11) . . . . ?

C51 Si2 C52 C55A -58.5(12) . . . . ?

C50 Si2 C52 C55A 63.1(12) . . . . ?


_refine_diff_density_max    1.193

_refine_diff_density_min   -0.481

_refine_diff_density_rms    0.059


_shelxl_version_number 2012-9
